# Supplementary material
Source: ML conference proceedings conference paper supplement (https://openaccess.thecvf.com/content/ICCV2025/html/Das_Training-Free_Personalization_via_ICCV_2025_paper.html)
Supplement: Supplementary file 1 [file Das_Training-Free_Personalization_via_ICCV_2025_supplemental.pdf]

# Training-Free Personalization via Retrieval and Reasoning on Fingerprints

## Supplementary Material

### 8. Supplementary Overview

In this supplementary, we provide a detailed statistics of the PerVA dataset in Section 8.1, qualitative example R2P demonstrating our proposed Attribute Focused CoT and Pair-wise Image Matching in Section 8.2, details on prompting in Section 8.3 and analysis of the proposed R2P on MyVLM and Yo’LLaVA datasets in Section Sec. 8.4.

#### 8.1. PerVA Dataset Overview and distribution

The PerVA dataset comprises 21 object categories with a total of 67,482 images distributed across 329 unique concepts. The dataset is structured to support training-free retrieval-augmented generation (RAG) approaches, with each concept represented by multiple training images and a smaller set of test images.

The dataset follows a balanced concept distribution across train and test splits, with identical concept coverage (329 concepts each) but different image quantities per concept. The training split contains 59,392 images with an average of 180.5 images per concept, while the test split contains 8,090 images with an average of 24.6 images per concept.

For our RAG-based approach, we constructed a reference database containing exactly one representative image per concept (329 images total), ensuring complete concept coverage across all categories.

| Category     | Concepts   | Train Images  | Test Images  | DB Images  |
|--------------|------------|---------------|--------------|------------|
| decoration   | 62         | 12,935        | 2,011        | 62         |
| retail       | 69         | 12,678        | 1,750        | 69         |
| clothe       | 30         | 5,437         | 873          | 30         |
| bag          | 25         | 4,534         | 426          | 25         |
| veg          | 20         | 3,419         | 604          | 20         |
| plant        | 17         | 2,971         | 485          | 17         |
| toy          | 13         | 2,440         | 136          | 13         |
| book         | 12         | 2,018         | 140          | 12         |
| cup          | 11         | 1,691         | 396          | 11         |
| pillow       | 9          | 1,584         | 174          | 9          |
| tumbler      | 8          | 1,496         | 296          | 8          |
| bowl         | 7          | 1,186         | 83           | 7          |
| towel        | 7          | 1,138         | 83           | 7          |
| remote       | 7          | 1,047         | 79           | 7          |
| plate        | 7          | 1,013         | 127          | 7          |
| bottle       | 7          | 978           | 102          | 7          |
| tie          | 6          | 885           | 53           | 6          |
| tro_bag      | 5          | 912           | 169          | 5          |
| umbrella     | 3          | 536           | 65           | 3          |
| headphone    | 2          | 259           | 22           | 2          |
| telephone    | 2          | 235           | 16           | 2          |
| <b>Total</b> | <b>329</b> | <b>59,392</b> | <b>8,090</b> | <b>329</b> |

Table 6. Category-wise distribution of the PerVA dataset

The dataset exhibits natural category imbalance reflecting real-world object distributions, with decoration and retail

categories containing the most concepts (62 and 69, respectively), while telephone and headphone categories contain the fewest (2 each). This distribution provides a realistic testbed for evaluating retrieval-based recognition systems across diverse object categories with varying levels of intra-category diversity.

#### 8.2. Additional qualitative example

In Figure 5, we qualitatively demonstrate the Concept Inference with Retrieval-Reasoning of R2P. Given a query about a personalized object (in this case, a cartoon cat) and the Top-K retrieved concepts along with their descriptions, R2P first performs attribute-focused Chain-of-Thought (CoT) reasoning on the fingerprint attributes of each retrieved concept. The model is instructed to compare the unique attributes between the query image and each description, then reason over them to identify the correct concept name. However, in this case, the model hallucinated the attribute 'pink bow on head' for the query, which is a fingerprint attribute for option A (i.e., marie-cat), leading to misclassification. Since attribute verification failed here, R2P proceeds to perform more computationally expensive pairwise reasoning, correctly identifying the concept name, which it then uses to generate a personalized caption.

#### 8.3. Prompting

In this section, we define the prompts used for our personalization task. Figure 6 shows the prompt template for creating the personal database. Here, we provide the model with the image, object category, and concept name, prompting it to identify the distinct attributes that make the object unique, compared to similar objects in the same category.

Figure 7 illustrates the prompt template for attribute-focused CoT reasoning. The model is shown the query image along with the retrieved concepts from the database. For each retrieved concept, the VLM is asked to compare the query image with its description and list the attributes that are common between the two. If no shared attributes are found, the model may omit mentioning any. Based on the matching attributes, the model carefully selects the option that best describes the query image.

Finally, Figure 8 shows the prompt for multimodal pairwise reasoning. The model is provided with the query image, the concept reference image, and the associated description. The model is prompted to compare the two images and determine whether they match. The description of the reference image is included to help the model identify relevant attributes in the query image, enabling a more informed deci-

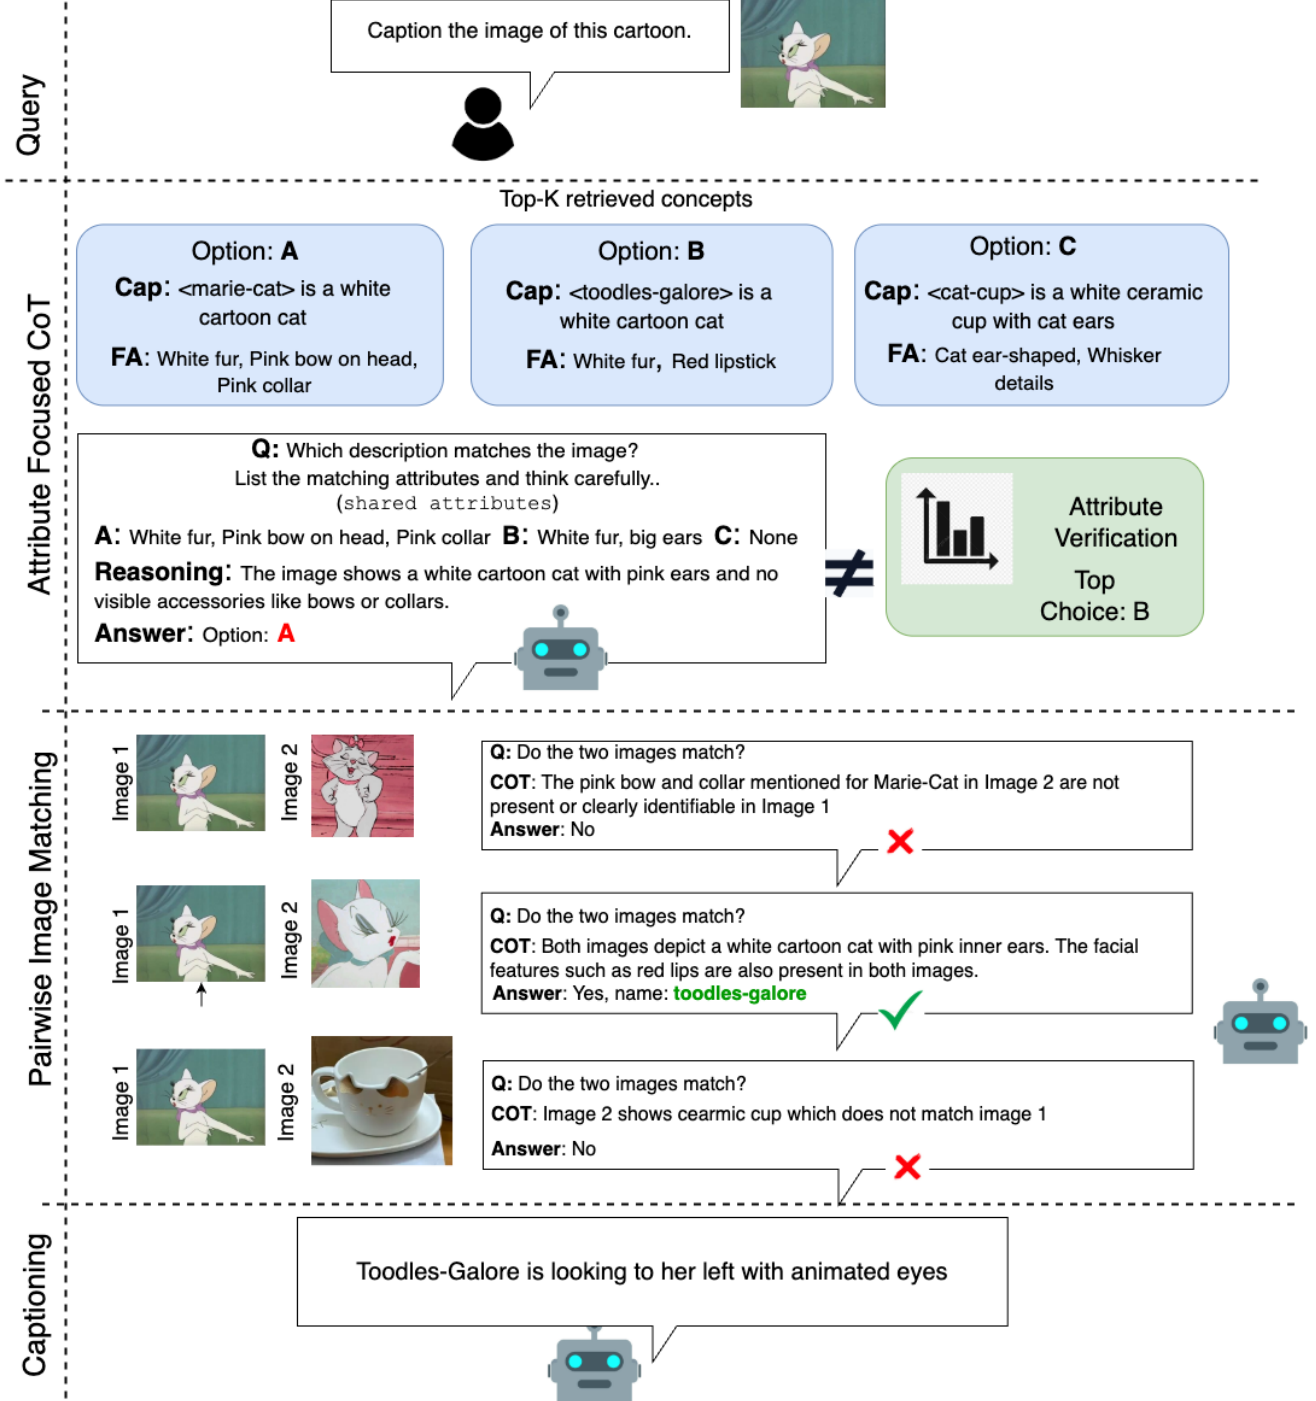

Figure 5. Qualitative example of the Concept Inference with Retrieval-Reasoning of R2P

sion. Please note that the prompts shown are for demonstration purposes only. In practice, we populate the descriptions of retrieved objects directly from the database.

#### 8.4. Additional Results

In this section we report additional ablation analysis on existing personalization datasets in the literature, namely MyVLM [4] and Yo’LLaVA [29].

Tab. 7 and Tab. 9 reports the ablation analysis of the pro-

Describe the  $\langle g_i \rangle$  in the image identified by the concept-identifier  $\langle c_i \rangle$  and highlight what makes it unique.

Your response MUST be in valid JSON format and must follow EXACTLY the format below:

```
{
  general: a brief description of the object in one sentence.,
  category: category of the object,
  distinct features: [List of distinct features that makes the
    object unique],
}
```

IMPORTANT:

- List only the most distinguishing features that set this object apart.
- Avoid generic descriptions that apply to every object in this category.
- Do not include any extra text or commentary. Any deviation from this format will be considered incorrect.

Figure 6. Prompt Template for Personal Database Creation

| Pairwise Reasoning | Fingerprint Attributes | Reasoning CoT | Recognition Wtd | Captioning Recall |
|--------------------|------------------------|---------------|-----------------|-------------------|
| ✗                  | ✗                      | ✗             | 96.1            | 87.4              |
| ✗                  | ✗                      | ✓             | 94.2            | 88.8              |
| ✓                  | ✗                      | ✗             | <b>98.7</b>     | 88.2              |
| ✓                  | ✗                      | ✓             | 97.6            | 89.6              |
| ✓                  | ✓                      | ✓             | 97.4            | <b>91.5</b>       |
| ✓                  | privileged             | ✓             | 97.8            | 91.1              |

Table 7. Ablation on pairwise reasoning, fingerprint attributes, and the use of CoT reasoning for **R2P** in terms of weighted recognition metrics ( $\uparrow$ ) and captioning recall ( $\uparrow$ ) on MyVLM [4]. We include a **privileged** version of our approach with human pre-defined fingerprint attributes for concepts.

posed approach on the use of pairwise-reasoning, fingerprint attributes and CoT reasoning of the underlying VLM. Results are mostly consistent with the main paper results on PerVA. Notably, we observe how in both the considered settings R2P outperforms the privileged approach relying on human-knowledge pre-defined attributes, showcasing how the VLM effectively relies on its knowledge to predict a discriminative attribute fingerprint.

Tab. 8 and Tab. 10 report the analysis on different verification strategies, following the experimentation reported in the main paper. MyVLM [4] and Yo’LLaVA [29] datasets are considered, respectively. Results show that R2P multimodal verification step outperforms the other compared strategies.

Finally, in Tab. 11 (MyVLM [4]) and Tab. 12 (Yo’LLaVA [29]) consistent observations on the effectiveness of the proposed multimodal concept retrieval are reported.

You are a helpful AI agent specializing in image analysis and object recognition.

Your task is to analyze and compare a query image with three provided descriptions.

Below are the description(s)

A. Name:  $\langle c_{i1} \rangle$ ,

Info: {general: A generic description about  $\langle c_{i1} \rangle$ ,  
category: category of  $\langle c_{i1} \rangle$ ,  
distinct features: [distinct feature 1, distinct feature 2, ...]}

B. Name:  $\langle c_{i2} \rangle$ ,

Info: {general: A generic description about  $\langle c_{i2} \rangle$ ,  
category: category of  $\langle c_{i2} \rangle$ ,  
distinct features: [distinct feature 1, distinct feature 2, ...]}

C. Name:  $\langle c_{i3} \rangle$ ,

Info: {general: A generic description about  $\langle c_{i3} \rangle$ ,  
category: category of  $\langle c_{i3} \rangle$ ,  
distinct features: [distinct feature 1, distinct feature 2, ...]}

Your Task:

- Compare the query image with each description and answer the following question:

Which description matches the subject in the image?

Answer in A, B, C.

- List shared attributes between the image and each description very concisely

- If no attributes match for a certain, generate None

- Provide a brief reasoning for your final answer.

- Respond strictly in the following JSON format:

```
{
  "A": "[Matching attributes for option A]",
  "B": "[Matching attributes for option B]",
  "C": "[Matching attributes for option C]",
  "Reasoning": "<Brief justification>",
  "Answer": "<one of A, B, C>"
}
```

Any deviation from this format will be considered incorrect.

Do not output any additional text.

Figure 7. Prompt template for Attribute-focused CoT reasoning

| Method                    | Captioning Recall |
|---------------------------|-------------------|
| Pairwise-reasoning        | 91.3              |
| No estimation             | 90.5              |
| Abstention                | 90.4              |
| Logits-based              | 90.8              |
| Attr. Verification (Ours) | <b>91.5</b>       |

Table 8. Ablation on verification strategies for **R2P** on MyVLM [4] dataset. Performance is evaluated based on captioning recall ( $\uparrow$ ).

You are a helpful AI agent specializing in image analysis and object recognition.

You are given two images: **Image 1** and **Image 2**.

Additionally, the name and a textual description of the object in **Image 2** is also provided below:

1. Name:  $\langle c_i \rangle$ ,

Info:

{general: A generic description about  $\langle c_i \rangle$ ,

category: category of  $\langle c_i \rangle$ ,

distinct features: [distinct feature 1, distinct feature 2, ...]}

Task:

- Compare the two images and answer the following question.

Can you see  $\langle c_i \rangle$  in this Image 1?

Answer with a single word, either yes or no.

- Provide your reasoning based on the two images and the given description.

- Generate your response with JSON format:

```
{
  "Reasoning": "<Your reasoning in 2-3 sentences.>",
  "Answer": "<yes or no>"
}
```

Output only the JSON response. DO NOT output any additional text.

Figure 8. Prompt Template for Image based pairwise comparison

| Pairwise Reasoning | Fingerprint Attributes | Reasoning CoT | Recognition Wtd | Captioning Recall |
|--------------------|------------------------|---------------|-----------------|-------------------|
| ✗                  | ✗                      | ✗             | 92.4            | 73.8              |
| ✗                  | ✗                      | ✓             | 89.1            | 76.8              |
| ✓                  | ✗                      | ✗             | 93.5            | 83.4              |
| ✓                  | ✗                      | ✓             | <b>95.4</b>     | 81.5              |
| ✓                  | ✓                      | ✓             | 94.4            | <b>87.1</b>       |
| ✓                  | privileged             | ✓             | 96.7            | 84.3              |

Table 9. Ablation on pairwise reasoning, fingerprint attributes, and the use of CoT reasoning for **R2P** in terms of weighted recognition metrics ( $\uparrow$ ) and captioning recall ( $\uparrow$ ) on Yo’LLaVA [29]. We include a **privileged** version of our approach with human pre-defined fingerprint attributes for concepts.

| Method                             | Captioning Recall |
|------------------------------------|-------------------|
| Pairwise-reasoning                 | 88.1              |
| No estimation                      | 82.0              |
| Abstention                         | 85.6              |
| Logits-based                       | 83.4              |
| Attr. Verification ( <b>Ours</b> ) | <b>91.5</b>       |

Table 10. Ablation on verification strategies for **R2P** on Yollava [29] dataset. Performance is evaluated based on captioning recall ( $\uparrow$ ).

| Embedding            | H@1         | H@3         | H@5         | H@10        |
|----------------------|-------------|-------------|-------------|-------------|
| DINOv2               | 64.7        | 80.3        | 86.5        | 93.8        |
| CLIP-Image           | 88.2        | 96.2        | 98.2        | <u>99.4</u> |
| CLIP-Text            | 80.5        | 95.6        | 98.1        | 98.7        |
| Multi-modal (2-step) | <u>92.2</u> | <u>98.2</u> | <u>98.8</u> | <u>99.4</u> |
| <b>R2P (Ours)</b>    | <b>93.5</b> | <b>98.5</b> | <b>99.4</b> | <b>100</b>  |

Table 11. Performance with different retrieval strategies evaluated in terms of HIT@K ( $\uparrow$ ) on MyVLM [4] dataset.

| Embedding            | H@1         | H@3         | H@5         | H@10        |
|----------------------|-------------|-------------|-------------|-------------|
| DINOv2               | 67.3        | 83.5        | 88.3        | 94.3        |
| CLIP-Image           | 82.9        | 93.4        | 94.9        | 100         |
| CLIP-Text            | 64.8        | 85.8        | 94.7        | <u>99.4</u> |
| Multi-modal (2-step) | <b>92.2</b> | <u>98.2</u> | <u>98.8</u> | <u>99.4</u> |
| <b>R2P (Ours)</b>    | <u>84.7</u> | <b>99</b>   | <b>99.6</b> | <b>100</b>  |

Table 12. Performance with different retrieval strategies evaluated in terms of HIT@K ( $\uparrow$ ) on Yo’LLaVA [29] dataset.
